# Supplementary material for: BAP31 Promotes Angiogenesis via Galectin-3 Upregulation in Neuroblastoma
Source: MDPI journal article supplement (doi:10.3390/ijms25052946), 2024-03-03
Supplement: s1 [file s1]

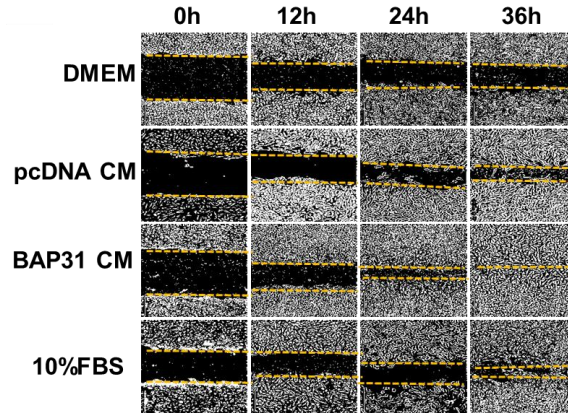

**Figure S1** Representative photomicrographs of the wound area and closure over time in Human endothelial cells cultured in different media. The wound closure from the fastest to slowest was as follows: BAP31 CM, pcDNA CM, 10% FBS and DMEM (negative control).

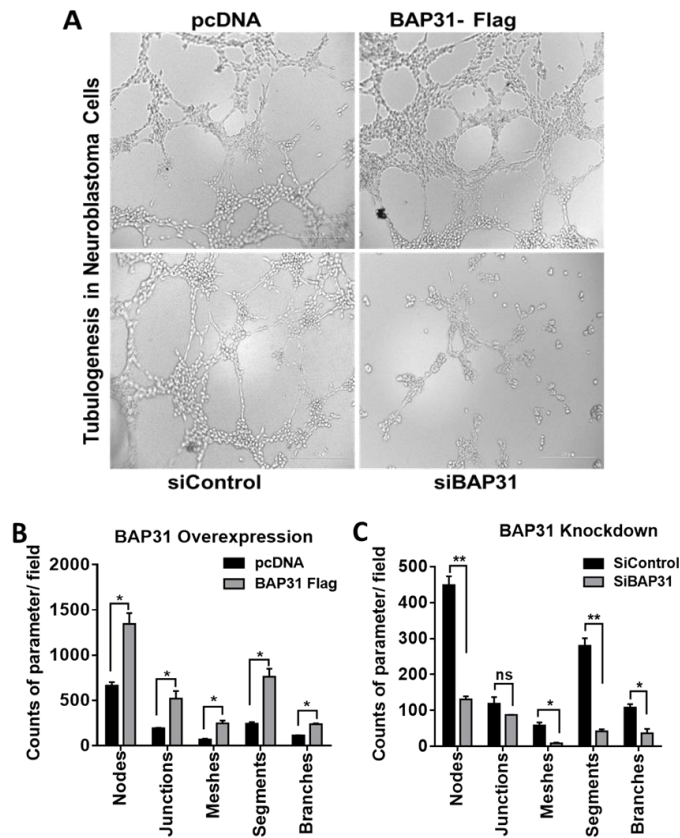

**Figure S2** BAP31 modulates SH-SY5Y cell morphology towards an angiogenic phenotype. **(A)** Representative micrographs of vascular mimicry by SH-SY5Y cells with controls (pcDNA for BAP31 overexpression, and siControl for BAP31 knockdown). **(B)** BAP31 overexpression tube formation parameters. **(C)** BAP31 knockdown tube formation parameters. Statistical significance was determined by a Student's t-test (\* $p < 0.05$ , \*\* $p < 0.01$ , \*\*\* $p < 0.001$  and \*\*\*\* $p < 0.0001$ ).

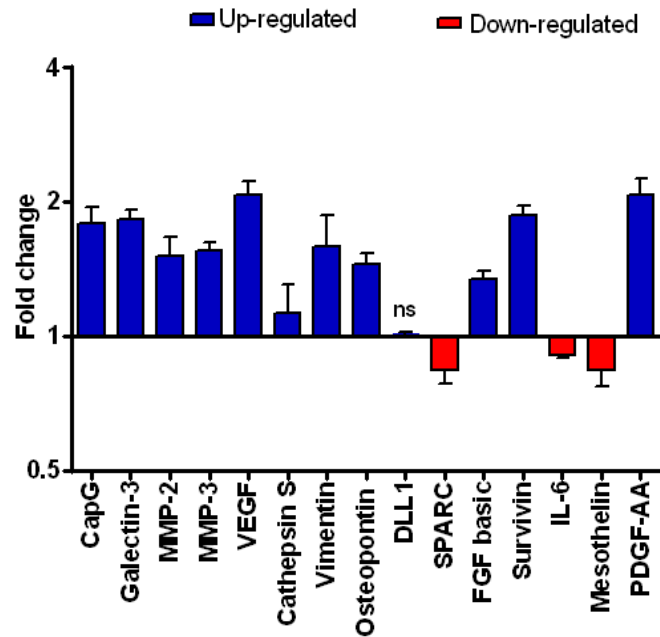

**Figure S3** Fold change of selected pro-angiogenic and anti-angiogenic factors from an oncology array assay following BAP31 overexpression in the SH-SY5Y cell line. The fold differences were as follows: CapG (1.7), Galectin-3 (1.8), MMP-2 (1.5), MMP-3 (1.6), VEGF (2.1), Cathepsin S (1.1), Vimentin (1.6), Osteopontin (1.5), DLL1 (1.0), SPARC (0.8), FGF basic (1.3), Survivin (1.9), IL-6 (0.9), Mesothelin (0.8), PDGF-AA (2.1).
